# Supplementary material for: A rapid aureochrome opto-switch enables diatom acclimation to dynamic light
Source: Research Square preprint supplement (doi:10.21203/rs.3.rs-2947310/v1), 2024-06-25
Supplement: Supplementary file 3 [file 87fb1eefc004d61aba4eeec2.docx]

**Inventory of supporting information**

- Supplementary Tables 1-2 and Supplementary Figs. 1-21 are provided in a combined PDF file.
- Supplementary Data 1-9 are provided in a combined excel file.

**Supplementary Table 1.** Pigment composition under growth light (GL) and after 6 h or 1 d of very high light (VHL; 1200 μmol photons m-2 s-1) treatment.

**Supplementary Table 2.** The content of fucoxanthin (Fx), diadinoxanthin (Ddx) and diatoxanthin (Dtx) after 10-min and 2-day of 900 μmol photons m-2 s-1 of high light treatment.

**Supplementary Fig. 1.** Importance of light dynamics and photoprotective responses in the biogeography of photosynthetic eukaryotes.

**Supplementary Fig. 2.** The light spectrum of each culture chamber.

**Supplementary Fig. 3.** The *P. tricornutum* photoprotection effectors LHCX2 and LHCX3 are required for cell fitness under high light.

**Supplementary Fig. 4.** Genotypes of mutants used in this research.

**Supplementary Fig. 5.** Single-nucleotide polymorphism (SNP) sequencing results of PCR products from wild type and mutant lines of *P. tricornutum* used in this study.

**Supplementary Fig. 6.** Uncropped images of the chlorophyll fluorescence phenotypes in main figures, containing data for independent cultures of the same line or data for independent lines.

**Supplementary Fig. 7.** Cell concentration and chlorophyll fluorescence of wild-type, *aureo1c-1* and COMP cultures after 1 d of very high light (VHL; 1200 µmol photons m-2 s-1 of white light) treatment.

**Supplementary Fig. 8.** *F*v/*F*m measurements of wild-type, *aureo1c-1* and COMP cells during a time course of very high light (VHL; 1200 µmol photons m-2 s-1 of white light) treatment.

**Supplementary Fig. 9.** NPQ measurements of wild-type, *aureo1c-1* and COMP cells after 4 hours of very high light (VHL; 1200 µmol photons m-2 s-1 of white light) treatment.

**Supplementary Fig. 10.** The effect of aureochrome mutation on the expression of *LHCX1* and *LHCX4* under growth light (GL) and high light (HL, 550 µmol photons m-2 s-1) conditions, based on RT-qPCR.

**Supplementary Fig. 11.** The COMP line accumulates the AUREO1c-GFP fusion protein.

**Supplementary Fig. 12.** The induction of *LHCX2/3* is responsive to changes in light intensity and dependent on the presence of AUREO1c.

**Supplementary Fig. 13.** The transcript of *LHCX2/3* in *P. tricornutum* under different light conditions measured by RT-qPCR.

**Supplementary Fig. 14.** The induction of *LHCX2/3* is responsive to changes in blue light intensity and dependent on the presence of AUREO1c.

**Supplementary Fig. 15.** Liquid chromatography–native mass spectrometry analyses of the recombinant AUREO1c protein.

**Supplementary Fig. 16.** The Phatr2_54065 model instead of the Phatr3_EG02404 model of *LHCX2* is supported by RNA-Seq results and PCR validation.

**Supplementary Fig. 17.** Transcript abundance of *LHCSR3.1* and *LHCSR3.2* in wild-type *C. reinhardtii* based on RT-qPCR at different time points after the switch from growth light (GL; 40 μmol photons m-2 s-1 of white light) to high blue light (260 μmol photons m-2 s-1).

**Supplementary Fig. 18.** Transcript abundances of *LHCSR3.1* and *LHCSR3.2* in wild-type *C. reinhardtii* cells cultured in the TAP medium and HS medium respectively, measured by RT-qPCR.

**Supplementary Fig. 19.** Transcript abundances of *LHCSR3.1* and *LHCSR3.2* in wild-type *C. reinhardtii*, after CL or FL treatments, relative to those under GL, measured by RT-qPCR.

**Supplementary Fig. 20.** Transcript abundances of *LHCSR3.1* and *LHCSR3.2* in wild-type *C. reinhardtii*, after continuous high light (CL) treatments, relative to those under GL, measured by RT-qPCR.

**Supplementary Fig. 21.** LHCSR3 protein abundance in *C. reinhardtii* wild type (WT) measured by proteomics.

**Supplementary Data 1.** Sequences of oligonucleotide primers used in this study.

**Supplementary Data 2.** Light intensity and quality for each experiment.

**Supplementary Data 3.** Raw read counts of genes in the RNA-Seq of *P. tricornutum* wild type and the *aureo1c-1* mutant under various light conditions.

**Supplementary Data 4.** Normalized read counts of genes in the RNA-Seq of *P. tricornutum* wild type and the *aureo1c-1* mutant under various light conditions.

**Supplementary Data 5.** Differences in the expression levels of each gene between *P. tricornutum* wild type and the *aureo1c-1* mutant under various light conditions and their statistical confidence.

**Supplementary Data 6.** Gene ontology (GO) term enrichment analysis among AUREO1c-dependent and AUREO1c-independent genes that are regulated in wild type from normal growth light (GL) to high white light (HWL).

**Supplementary Data 7.** Whole-cell proteomics data for wild-type *C. reinhardtii* (TAP medium) containing relative abundance of each detected protein.

**Supplementary Data 8.** Whole-cell proteomics data for wild-type *C. reinhardtii* (HS medium) containing relative abundance of each detected protein.

**Supplementary Data 9.** Whole-cell proteomics data for wild-type *P. tricornutum* and the *aureo1c-1* mutant containing relative abundance of each detected protein.
