# Supplementary material for: A rapid aureochrome opto-switch enables diatom acclimation to dynamic light
Source: Research Square preprint supplement (doi:10.21203/rs.3.rs-2947310/v1), 2024-06-25
Supplement: Supplementary file 4 [file 9a72369fa5476e0c603659e3.docx]

| **Author Checklist** | NCOMMS-23-40122A |
| --- | --- |
| 0000000000000000000000000000000000000000000000000000000000000 | 0000000000000000000000000000000000000 |
| **Please check the items below carefully and add a response in each row of the table to indicate the changes that you have made. Please also check through any additional marked-up edits we may have provided within the manuscript file.** | |
|  |  |
| **Remaining reviewer comments** |  |
| Our guidance: | Your response: |
| Please consider whether any of the figures for reviewers (R1-R4) in your recent rebuttal should be integrated into the manuscript, if they would help readers better understand your study. | Thanks for your reminder. These figures are not essential for readers to understand the content of the manuscript. So we are not integrating them. |
|  |  |
| **Abstract and editor's summary** |  |
| Our guidance: | Your response: |
| The abstract — which should be roughly 150 words long and contain no references — should serve both as a general introduction to the topic and a non-technical summary of your main results and their implications. It should contain a brief account of the background and rationale of the work, followed by a statement of the main conclusions introduced by the phrase 'Here we show' or some equivalent phrase. Because we hope that researchers in a wide range of disciplines will be interested in your work, the abstract should be as accessible as possible, explaining essential but specialized terms concisely. When discussing the current work in the abstract, please also use the present tense. | We have refined the abstract and shortened it to 152 words. |
|  |  |
| **Author information** |  |
| Our guidance: | Your response: |
| We ask that you consult with your coauthors to ensure that all names, affiliations, and titles are represented correctly. Note that if any authors are added or removed after this point then all authors will be requested to provide approval documentation that could potentially delay the production of your paper. | We confirm that these are correct. |
| Please ensure only one department or institution is listed in a single affiliation. | We confirm that these are correct. |
|  |  |
| **Article structure** |  |
| Our guidance: | Your response: |
| We can accommodate up to 10 display items (Figures or Tables) in the main article. Each Figure and Table must fit easily within an A4 page (210 x 297 mm). Please ensure that the number and size of your Figures and Tables fulfil these requirements to avoid any delay in the acceptance of your article. | We confirm that our Figures fulfill the requirements and we do not have Tables. |
| **Please ensure your main manuscript file includes the following sections, in this order:** |  |
| *Title Author list Affiliations Abstract Introduction Results Discussion (optional) Results and Discussion (optional) Methods Data Availability Code Availability (if relevant) References Acknowledgements Author Contributions Statement Competing Interests Statement Tables Figure Legends/Captions (for main text figures)* |  |
| We do not edit Supplementary Information files; they will be uploaded with the published article as they are submitted with the final version of your manuscript. Any tracked changes and line numbers should be removed from the file and the file should be provided as a PDF file. Supplementary Figures do not need to be provided separately. | We confirm that we have these sections in the current order. |
| Please note that all Supplementary Information must be provided as a single separate PDF file, not within the manuscript file.  All Supplementary Information items (e.g. Supplementary Figures, Supplementary Tables, Supplementary Methods, Supplementary Notes, Supplementary Discussion, Supplementary References) must be included in one PDF document. Please refer to our formatting guide when preparing your supplementary information file: https://www.nature.com/documents/ncomms-formatting-instructions.pdf   All Supplementary Information files (e.g. Supplementary Data, Supplementary Software, etc.) must be cited in the main text.  Every Supplementary Figure must be accompanied by a legend of up to 350 words, referring to all panels, and a brief title that summarises the whole figure.  Only Supplementary Movie, Audio, Data and Software files should be submitted separately from the Supplementary Information. |  |
| Please supply legends for each Supplementary Data file in your response here (not in the Supplementary Information file or main text). Please label each files as Supplementary Data 1, etc. | Legends for Supplementary Data files:  Supplementary Data 1. Sequences of oligonucleotide primers used in this study.  Supplementary Data 2. Light intensity and quality for each experiment.  Supplementary Data 3. Raw read counts of genes in the RNA-Seq of *P. tricornutum* wild type and the *aureo1c-1* mutant under various light conditions.  Supplementary Data 4. Normalized read counts of genes in the RNA-Seq of *P. tricornutum* wild type and the *aureo1c-1* mutant under various light conditions.  Supplementary Data 5. Differences in the expression levels of each gene between *P. tricornutum* wild type and the *aureo1c-1* mutant under various light conditions and their statistical confidence.  Supplementary Data 6. Enrichment analyses of gene ontology (GO) terms among AUREO1c-dependent and AUREO1c-independent genes that were regulated in wild type from normal growth light (GL) to high white light (HWL).  Supplementary Data 7. Whole-cell proteomics data for wild-type *C. reinhardtii* (TAP medium) containing relative abundance of each detected protein.  Supplementary Data 8. Whole-cell proteomics data for wild-type *C. reinhardtii* (HS medium) containing relative abundance of each detected protein.  Supplementary Data 9. Whole-cell proteomics data for wild-type *P. tricornutum* and the *aureo1c-1* mutant containing relative abundance of each detected protein. |
|  |  |
| **Main text** |  |
| Our guidance: | Your response: |
| Please ensure that gene and protein names are formatted according to community standards for the organism in question. Italicize gene symbols and functionally defined locus symbols; do not use italics for proteins. | We confirm that the gene and protein names are presented correctly. |
| Please do not use italics, bold font, underlining or speech marks/quotation marks except in headings unless required for technical terms (in both the main text and the display items). | We confirm this. |
| Please make sure that mathematical terms throughout your manuscript and Supplementary Information (including in figures, figure axes, and legends) conform strictly to the following guidelines. Equations must be supplied in editable format, and not as images. Scalar variables (e.g. x, V, χ) must be typeset in italic, whereas multi-letter variables and functions (e.g. log) must be formatted in roman. Vectors (such as the wavevector k or the magnetic field vector B) must be typeset in bold without italics. | Our formula format fulfils the specified requirements. |
| Please use italics for species names, both in the main text and the display items. | We confirm that the species names are presented in italics. |
|  |  |
| **Figures and Tables** |  |
| Our guidance: | Your response: |
| Please see the guidelines linked below for detailed instructions about how your figures should be prepared. Following these instructions will reduce the chances of delays should we need to request replacement artwork from you at a later stage. |  |
| <https://www.nature.com/documents/NRJs-guide-to-preparing-final-artwork.pdf> | Thank you for your reminder. |
| Wherever statistics have been derived (e.g. error bars, box plots, statistical significance) the legend needs to provide and define the n number (i.e. the sample size used to derive statistics) as a precise value (not a range). Please define how many replicates were performed and whether they are biological (derived from different experimental units or subjects) or technical (multiple contemporary measurements from the same experimental unit or subject). Samples should be unambiguously described, including a clear definition of the unit of study. In studies using model organisms, cell lines, primary cell cultures, plants or micro-organisms, the unit of study is the smallest object that could be randomly and independently assigned to an intervention. The groups being compared, including control groups, should be clearly defined. If no control group has been used, the rationale for this should be stated. Please ensure there are enough details about sample collection to distinguish between independent data points and technical replicates- splitting a biological sample into 3 tubes or wells receiving the same treatment does not constitute independent replication.  We strongly discourage deriving statistics from technical replicates or less than 3 biological replicates, unless there is a clear scientific justification for why providing this information is important. Conflating technical and biological variability, e.g., by pooling technically replicates samples across independent experiments is strongly discouraged. | For Fig. 1d and Fig. 4e, we have added that three replicates were performed. |
| **Please note that this information is missing in the legend(s) of figure(s) 1d; 4e** |  |
| We strongly discourage deriving statistics from technical replicates or less than 3 biological replicates, unless there is a clear scientific justification for why providing this information is important. Conflating technical and biological variability, e.g., by pooling technical replicate samples across independent experiments is strongly discouraged. (For examples of expected description of statistics in figure legends, please see the following https://www.nature.com/articles/s41467-019-11636-5). |  |
| Statistics such as error bars, sigificance and p-values, cannot be derived from n<3 and must be removed from all such cases. |  |
| **Please note that this should be rectified for figure(s) 4d** | We have removed the error bars from Fig. 4d. |
| All error bars need to be defined in the legends (e.g. SD, SEM) together with a measure of centre (e.g. mean, median). For example, the legends should state something along the lines of “Data are presented as mean values +/- SEM” as appropriate. All box plots need to be defined in the legends in terms of minima, maxima, centre, bounds of box and whiskers and percentile. |  |
| **Please note that the error bars/error bands need to be defined in the legend(s) of figure(s) 1d; 4e  Please note that the measure of centre for the error bars/error bands needs to be defined in the legend(s) of figure(s) 4a, c** | We have defined the error bars in Fig. 1d and Fig. 4e.  We have specified that the measure of centre was the mean value in Fig. 4a and Fig. 4c. |
| The figure legends must indicate the statistical test used. Where appropriate, please indicate in the figure legends whether the statistical tests were one-sided or two-sided and whether adjustments were made for multiple comparisons. For null hypothesis testing, please indicate the test statistic (e.g. F, t, r) with confidence intervals, effect sizes, degrees of freedom and P values noted. Please provide the test results (e.g. P values) as exact values whenever possible and with confidence intervals noted. |  |
| **Please indicate the statistical test used for data analysis and where appropriate, please specify whether it was one-sided or two-sided and whether adjustments were made for multiple comparisons, in the legend(s) of figure(s) 3a  Please note that the information on whether the statistical test used was one-sided or two-sided, where appropriate, is missing in the legend(s) of figure(s) 2d  Please note that the exact p value should be provided, when possible, in the legend(s) of figure(s) 1e  Please indicate what */ **/ ***/ **** represents; if this represents p value(s), please indicate the statistical test used and where appropriate, specify whether it was one-sided or two-sided and whether adjustments were made for multiple comparisons and the exact p value in the legend(s) of figure(s) 4a** | The *P* values were obtained from the one-sided Fisher’s exact test, and Benjamini-Hochberg method was used to adjust for multiple comparisons in Fig. 3a. This has now been specified in the legend.  A two-sided test was used in Fig. 2d. This has now been specified in the legend.  We have added exact *P* values in the legend of Fig. 1e**.**  The meaning of */** is now described in the revised manuscript; a one-sided unpaired *t*-test was used to analyze the data in Fig. 4a. No adjustments were made for multiple comparisons when we obtained *P* values, and this has now been specified in the legend. |
| Please state in the legends how many times each experiment was repeated independently with similar results. This is needed for all experiments, but is particularly important wherever results from representative experiments (such as micrographs) are shown. If space in the legends is limiting, this information can be included in a section titled “Statistics and Reproducibility” in the methods section. | We have added related descriptions in Fig. 2a and Fig. 3f, as well as other places such as Supplementary Figure legends. |
| **Please revise this information in the legend(s) of figure(s) 2a; 3f** |  |
|  |  |
| **Data and Code** |  |
| Our guidance: | Your response: |
| Nature journals strongly support public availability of data and code. Please deposit the data and code used in your paper into a public data repository, or alternatively, present the data as Supplementary Information. If data can only be shared on request, please explain why in your Data Availability Statement, and also in the correspondence with your editor.   Please note that for some data types, deposition in a public repository is mandatory. Any restrictions on sharing of these data types must be clearly indicated in the statement and discussed with the editor. More information on our data deposition policies and available repositories can be found here: |  |
| <https://www.nature.com/nature-research/editorial-policies/reporting-standards#availability-of-data> | All large datasets (proteomics, sequencing...) in this study are available from public databases. |
| All published manuscripts reporting original research in Nature Portfolio journals must include a data availability statement, within the Methods and under the heading 'Data Availability'.   The data availability statement must make the conditions of access to the “minimum dataset” that are necessary to interpret, verify and extend the research in the article, transparent to readers. We ask that you don’t use phrases like ‘available on reasonable request’ but instead specify any restrictions to accessing your data as described below.  This minimum dataset may be provided through deposition in public community/discipline-specific repositories, custom proprietary repositories or general repositories like Figshare, Zenodo and Dryad. Providing large datasets in supplementary information is strongly discouraged and the preferred approach is to make data available in repositories. Please see https://www.springernature.com/gp/authors/research-data-policy/recommended-repositories for a list of recommended repositories.  If DOIs are provided, we also strongly encourage including these in the Reference list (authors, title, publisher (repository name), identifier, year).  The Data Availability Statement should also reference any source data published alongside the paper.  If data are unavailable, please indicate the exact reasons why data cannot be made available in a suitable public repository or upon request, including any conditions related to ethical approval, consent from study subjects, commercial or legal restrictions, etc.  For data that are available under restricted access, the Data Availability statement must specify - the reasons for access restrictions - what the restrictions are  - how one can get access to the data - who to contact to request access - any restrictions on who the data can be made available to or for which purpose - the expected timeframe for response to access requests - for how long the data will be available once access has been granted. | The accession numbers are presented in Data Availability section. |
| Your data availability statement needs to be much more detailed and specific, like the version you have in your Reporting Summary. Please use the following template to provide all the information stated above:  The XX data generated in this study have been deposited in the YY database under accession code ZZ [add hyperlink here]. The XX data are available under restricted access for {insert reason}, access can be obtained by {explain how}. The raw XX data are protected and are not available due to data privacy laws. The processed XX data are available at YY. The XX data generated in this study are provided in the Supplementary Information/Source Data file. The XX data used in this study are available in the YY database under accession code ZZ [Add hyperlink here].  Your list of accession numbers should be integrated into the data availability statement, along with hyperlinks.  Please provide the accession codes of the datasets (Proteome Xchange by PRIDE Submission Tool) generated in the study in the reporting summary as well as the data availability section of the manuscript. | We have now updated our Data availability section to contain all the accession details for sequencing data and proteomics data. |
| Please ensure that all DNA sequencing or RNA-seq data is deposited in an approved, publicly accessible repository listed here (https://www.nature.com/nature-research/editorial-policies/reporting-standards#availability-of-data), and that relevant accession codes are stated in the data availability statement. | Our sequencing data are on NCBI SRA, which is listed on the webpage you provide. The accession codes are stated in the Data availability section. |
|  |  |
| **Methods** |  |
| Our guidance: | Your response: |
| GENERAL REQUIREMENTS: Please provide a full description of the mass spectrometry experiments. This should include – the total number of samples analyzed, numbers and types of controls, number of technical and/or biological replicates (even if n=1) – the sample preparation protocol – LC/GC parameters, MS acquisition settings, type and vendor of LC/GC/MS instruments – a description of the data annotation/validation/analysis procedure – all software tools (including version number and relevant settings) and statistical tests that have been used and citations of the corresponding references   ADDITIONAL REQUIREMENTS FOR BOTTOM-UP AND TOP-DOWN PROTEIN MASS SPECTOMETRY Please provide a detailed description of the database search parameters and criteria for peptide/protein identification (e.g. name and version of identification software, name and version of protein sequence database, protease cleavage sites and number of missed cleavages, fixed and variable modifications, mass tolerance for precursor and fragment ions, minimum peptide length, any applied score cutoffs including for PTM localization, peptide- and protein-level FDR, minimum number of unique peptides for protein identification, etc. as applicable)   ADDITIONAL REQUIREMENTS FOR HDX-MS: Please ensure that the HDX-MS methods and data reporting complies with the community standards described by Masson et al. (https://www.nature.com/articles/s41592-019-0459-y) and include the HDX summary table (Supp Table 1 in the Masson et al. paper) as a Supplementary Table in your Supplementary Information PDF.   ADDITIONAL REQUIREMENTS FOR METABOLOMICS/LIPIDOMICS: Please make sure that the reporting of your metabolomics and lipidomics data and methods complies with the community requirements:  For metabolomics: see Box 1 in https://www.nature.com/articles/s41592-021-01197-1 and Supplementary File 2 in https://link.springer.com/article/10.1007/s11306-022-01926-3 – For lipidomics: see https://www.nature.com/articles/s42255-022-00628-3 | We now provide these details in the updated Methods section. |
| Sufficient details of the experiments must be provided in the Methods section such that they could be reproduced without reference to published papers. Use of the term "as described previously" is not encouraged. | The protocol details are thoroughly presented in the Methods section. |
| Sequences of oligonucleotides (e.g. primers, RNAi, Crispr), or company names and catalog numbers if reagents are commercial, should be provided in the Methods. If this information is lengthy, it may be provided in Excel format, as separate Supplementary Data, mentioning the file in the Methods. | All primer sequences are provided in Supplementary Data 1. This Dataset and the primer names are clearly cited in the Methods part. |
|  |  |
|  |  |
| **End matter** |  |
| Our guidance: | Your response: |
| Nature Portfolio defines Competing Interest (CI) as financial and non-financial interests (including but not limited to funding, employment, stocks, shares, patents, personal or professional relationships with individuals or institutions, and unpaid membership advocacy) that could be perceived to directly undermine the objectivity, integrity, and value of a publication, or could be seen as having an influence on the judgments and actions of authors with regard to objective data presentation, analysis, and interpretation.  Please thoroughly review our policy on Competing Interests and include a detailed statement both in your final manuscript file and in our manuscript tracking system. Please ensure the statements are identical in both. Be specific about how each point stated relates to the research and list applicable author initials, and/or patent numbers.  If there are no competing interests, a negative statement must be included. |  |
| <https://www.nature.com/nature-research/editorial-policies/competing-interests> | A complete Competing Interests, including a patent application, is shown in the manuscript and provided in the submission system. |
| Please confirm that all relevant funding awarded to each author is described in the Acknowledgements section. List each grant number, followed by the initials of the author who received it. | We confirm this. |
|  |  |
| **Additional Revisions** |  |
| Our Guidance: | Your Response: |
| For any Supplementary Figures, please check and confirm that:  * If data is presented as bar charts, individual data points are shown using overlaid dot plots.  * The n number (i.e. the sample size used to derive statistics) is provided and defined as a precise value (not a range), using the wording “n=X samples/cells/independent experiments” etc. where applicable.  * Any chart axis, error bars, scale bars, molecular weight markers, symbols and colour scales are defined.  * Any statistical tests used for data analysis are specified and exact p-values are provided either on the figures themselves, in the legend or in the Source Data file.  * Wherever representative data such as blots or micrographs are shown, the legend indicates how many times the experiment was repeated with similar results.  * Full uncropped scans of any cropped gel/blot images are provided as an additional Supplementary Figure or in the Source Data file.  Please also consider adding a supplementary figure that exemplifies your flow cytometry gating strategy, as requested in the Reporting Summary. | We reviewed and confirmed that the updated Supplementary Figures and legends meet all requirements.  The uncropped gel/blot images are provided in Source Data.  The gating schemes have been added as panels of Supplementary Fig. 7 and Supplementary Fig. 11. |
|  |  |
| **Preparing your manuscript files** |  |
| Our guidance: | Your response: |
| Unless otherwise stated please limit individual file sizes to approximately 30MB. We strongly encourage the use of repositories for large datasets or source data due to size considerations. | All individual file sizes are less than 30MB. |
| Please supply a brief (maximum 350 characters, including spaces) summary of the main findings of the paper to be used on our website and in our e-alerts. The summary should be written in the third person in language suitable for a broad audience. The summary may be edited by the editors prior to publication. | Diatoms thrive in dynamic environments that frequently confer high light stress. In this study, the authors report a diatom photoreceptor that trigger immediate transcription of photoprotective genes upon high light signals. The fast response kinetics of this pathway confer advantages in environments with rapid light fluctuations. |
| To ensure maximum visibility for your work, we may post about your paper following publication. If you would like us to include the X (formerly Twitter) handles of the first author(s), corresponding author(s), lab or institution in this post, please provide them here. We would also welcome your suggestions for hashtags to use when posting about the work. | Account: XiaoboLi11  Suggestions:  #diatom  #photosynthesis |
| Please supply the main manuscript file in either Microsoft Word or LaTeX format | The main manuscript file is provided in Microsoft Word. |
| Please provide figures as individual vector files with editable text. Acceptable file types for figures are .ai, .eps, .pdf, .ppt or Chem Draw for fully editable vector-based art. For detailed guidance on figure preparation, see https://www.nature.com/documents/aj-artworkguidelines.pdf | All figures are provided as pdf files. |
| The use or adaptation of previously published images is strongly discouraged. If this is unavoidable, please request the necessary rights documentation to re-use such material from the relevant copyright holders and return this to us when you submit your revised manuscript. Please check whether your manuscript or Supplementary Information contain third-party images, such as figures from the literature, stock photos, clip art or commercial satellite and map data.  If you have used content from BioRender please provide us with a copy of your license. Please also follow the link below to request the appropriate form from BioRender for publication of their figures. https://help.biorender.com/en/articles/8601313-creative-commons-licensing-for-biorender-figures-premium-only  Please note a CC-BY permission form must be obtained from BioRender if your work is due to be published under a CC-BY license and you must adhere to the attribution guidelines as set out by the license.  For more information on what constitutes ownership by a third party, please contact our Editorial Assistant at naturecommunications@nature.com | All figures and images were either photographs taken by us or drawn by ourselves using Adobe Illustrator. |
| Please check in particular: |  |
| **1. Please note that suspected third party content is present in figures 1 (a, b, f), 2b, 3c, 5,; Supplementary figures 1, 3a, 4 (a-e), 5(a-d).** |  |
|  |  |
| **Forms to complete** |  |
| Our guidance: | Your response: |
| **Editorial Policy Checklist** |  |
| Please update and upload a final version of the Editorial Policy Checklist with your revised manuscript files. A blank Editorial Policy Checklist can be found via the link below. Note that this form is a dynamic ‘smart pdf’ and must be downloaded and completed in Adobe Reader. |  |
| Please update your current checklist or download from: |  |
| <https://www.nature.com/documents/nr-editorial-policy-checklist.zip> | We are providing the newest version of the Editorial Policy Checklist in the submission. |
| **Reporting Summary** |  |
| Please revise the Reporting Summary according to the requests below. After making the requested changes, please be sure to include the final version of your Reporting Summary in your submission as a supplementary information file. Please note that this form is a dynamic 'smart pdf' and must therefore be downloaded and completed in Adobe Reader, instead of opening it in a web browser. |  |
| Please update your current checklist or download from: |  |
| https://www.nature.com/documents/nr-reporting-summary.pdf | We are providing the newest version of Reporting Summary in the submission. |
| **Reporting Summary** |  |
| Our Guidance: | Your Response: |
| **Software** |  |
| Please ensure all the data collection/data analysis software/tools/algorithms/packages used in the study are clearly mentioned in the manuscript and are also listed in the reporting summary (with version numbers). | We confirm this. |
| **Data Availability** |  |
| Please provide a complete data availability statement in the manuscript and in the reporting summary. | We confirm this. |
| Please provide the accession codes of the datasets (Proteome Xchange by PRIDE Submission Tool) generated in the study in the reporting summary as well as the data availability section of the manuscript. | We confirm this. |
| **Field Specific Reporting** |  |
| **Life Sciences Study Design** |  |
| Please state how often the experiments were replicated or performed independently. | These have been added in figure legends or the Methods section. |
| Please describe how sample sizes were determined (for all experiments performed in this study) and provide a rationale for how they were chosen, detailing any statistical methods used to predetermine sample size and/or including relevant citations if available. If no sample size calculation was performed, describe how sample sizes were chosen and provide a rationale for why these sample sizes are sufficient. | Sample sizes were chosen empirically based on previous studies in the field. |
| **Antibodies** |  |
| Please specify the source and amount/dilution of all antibodies used. For commercially sourced antibodies please state the supplier name, catalog number, clone name, lot number as applicable in both the manuscript and relevant section of the Reporting Summary. | The source information was provided in the manuscript and Reporting Summary. We have now added the dilution of the antibodies in both places. |
| Please provide information on antibody validation in the reporting summary for all the primary antibodies. Please refer to the specific section of the manuscript, previous literature or manufacturer websites as applicable. | This information is provided in the Reporting Summary. |
| **You will need to upload:** |  |
| Editorial Policy Checklist | YES |
| Completed Third Party Rights Table (if relevant) | NO |
| A point-by-point response to the reviewers' comments | YES |
| A completed copy of this checklist | YES |
| The main manuscript file in either Microsoft Word or LaTeX format | YES, in Word; we also provide an additional file with this round of changes marked |
| Separate Figure files | YES |
| Inventory of Supporting Information | YES |
| A Supplementary Information file | YES, a combined PDF file with Supplementary Tables and Figures |
| Supplementary Data files | YES, a combined excel file |
| Reporting Summary | YES |
|  |  |
